# Supplementary material for: EASY-NET Program: Methods and Preliminary Results of an Audit and Feedback Intervention in the Emergency Care for Acute Myocardial Infarction in the Lazio Region, Italy
Source: MDPI journal article supplement (doi:10.3390/healthcare11111651), 2023-06-05

## Supplementary Material

|                                                                                                                                                                                                                                                                                                           |                                     |
|-----------------------------------------------------------------------------------------------------------------------------------------------------------------------------------------------------------------------------------------------------------------------------------------------------------|-------------------------------------|
| Table S1. Type of information collected in the “Audit form” .....                                                                                                                                                                                                                                         | 2                                   |
| Table S2. ICD-9-CM codes .....                                                                                                                                                                                                                                                                            | 3                                   |
| Table S3. Link to indicators protocols for AMI pathways .....                                                                                                                                                                                                                                             | 5                                   |
| Table S4. Link to indicators protocols for ischemic stroke pathways.....                                                                                                                                                                                                                                  | 5                                   |
| Figure S1 and Table S5: Number of hospitalizations of patients with STEMI by facility (2021). .....                                                                                                                                                                                                       | <b>Error! Bookmark not defined.</b> |
| Figure S2 and Table S6: Proportion of patients with STEMI treated with PTCA within 90 min from access to ER of total treated with PTCA within 12 h, by facility (2021). .....                                                                                                                             | <b>Error! Bookmark not defined.</b> |
| Figure S3 and Table S7: Mortality within 30 days after first admission to hospital for AMI, by facility (2021). .....                                                                                                                                                                                     | 6                                   |
| Figure S4 and Table S8: In-hospital mortality within 30 days after first admission to hospital for STEMI, by facility (2021). .....                                                                                                                                                                       | <b>Error! Bookmark not defined.</b> |
| Figure S5 and Table S9: In-hospital mortality within 30 days after first admission to hospital for AMI, by facility (2021). ..                                                                                                                                                                            | 7                                   |
| Figure S6: Proportion of patients with STEMI treated with PTCA within 90 min from access to ER, by facility (2021). A: facility in volume class 0-10, B: facility in volume class 11-50, C: facility in volume class 51-100, D: facility in volume class 101-150, E: facility in volume class >=150. .... | 8                                   |
| Figure S7: Mortality within 30 days after first admission to hospital for STEMI, by facility (2021). A: facility in volume class 0-10, B: facility in volume class 11-50, C: facility in volume class 51-100, D: facility in volume class 101-150, E: facility in volume class >=150. ....                | 9                                   |

| <b>Requested Information</b>                                                                                                                                                                                                                                                                                                                         | <b>Responses</b>                                                                                                                                                                                                                                                                                                                                                                                  |
|------------------------------------------------------------------------------------------------------------------------------------------------------------------------------------------------------------------------------------------------------------------------------------------------------------------------------------------------------|---------------------------------------------------------------------------------------------------------------------------------------------------------------------------------------------------------------------------------------------------------------------------------------------------------------------------------------------------------------------------------------------------|
| <b>Was an Audit conducted on the results of the last monitoring?</b>                                                                                                                                                                                                                                                                                 | Yes<br>No                                                                                                                                                                                                                                                                                                                                                                                         |
| <b>Which of the following actions were implemented in preparing and conducting the Audit?</b>                                                                                                                                                                                                                                                        | Identification of all stakeholders to be involved<br>Convening the Audit meeting<br>Discussion of the results of the monitoring indicators<br>Presentation and discussion of clinical cases<br>Identification of improvement actions<br>Identification of those responsible for the implementation of improvement actions<br>Clear identification of time for verification of implemented actions |
| <b>Has an Audit Manager been identified?</b><br><br>(If yes, please indicate the Audit Manager profession/discipline and role in the Structure)                                                                                                                                                                                                      | Yes<br>No                                                                                                                                                                                                                                                                                                                                                                                         |
| <b>Has a Multidisciplinary Audit Team been established?</b><br><br>(If yes, please indicate the composition of the Multidisciplinary Team)                                                                                                                                                                                                           | Yes<br>No                                                                                                                                                                                                                                                                                                                                                                                         |
| <b>Were additional indicators calculated and discussed compared to those contained in the last report submitted?</b><br><br>(If yes, please indicate the additional indicators considered in the Audit, the reference year for the calculation and the result.)                                                                                      | Yes<br>No                                                                                                                                                                                                                                                                                                                                                                                         |
| <b>Overall, were quality indicators identified that deviate from the standard value and/or the regional reference value?</b><br><br>(If yes, please report the indicators that deviate from the reference value)                                                                                                                                     | Yes<br>No                                                                                                                                                                                                                                                                                                                                                                                         |
| <b>The overall results of the evaluation were disseminated to the healthcare professionals involved in the care pathway in question?</b><br><br>(If yes, indicate the professionals to whom the reports were sent e.g. doctors, nurses, etc.)                                                                                                        | Yes<br>No                                                                                                                                                                                                                                                                                                                                                                                         |
| <b>Was an audit report produced?</b><br><br>(If yes, please indicate the professionals to whom the report was sent)                                                                                                                                                                                                                                  | Yes<br>No                                                                                                                                                                                                                                                                                                                                                                                         |
| <b>What improvement actions have been identified?</b><br><b>For each indicator showing deviations from the reference values, identify one or more improvement actions.</b><br><br>Specify the timeframe in which the level of implementation of the identified improvement actions will be verified? (e.g. 1 - 2 months; 3 - 4 months; 5 - 6 months) | Free response                                                                                                                                                                                                                                                                                                                                                                                     |
| <b>Depending on the presence and degree of the identified deviation, were identified structure objectives to be achieved for the indicators considered?</b>                                                                                                                                                                                          | Yes<br>No                                                                                                                                                                                                                                                                                                                                                                                         |

|                                                                        |  |
|------------------------------------------------------------------------|--|
| (If yes, please report these objectives in relation to the indicators) |  |
|------------------------------------------------------------------------|--|

**Table S1.** Type of information collected in the “Audit form”.

**Table S2.** ICD-9-CM codes.

| Indicators                                                                        | Calculation                                                                                                                                                                                               | Data sources | ICD9-CM primary or secondary diagnoses codes                                                                                                    |                          | ICD9-CM procedures codes                 |
|-----------------------------------------------------------------------------------|-----------------------------------------------------------------------------------------------------------------------------------------------------------------------------------------------------------|--------------|-------------------------------------------------------------------------------------------------------------------------------------------------|--------------------------|------------------------------------------|
|                                                                                   |                                                                                                                                                                                                           |              | Inclusion                                                                                                                                       | Exclusion                | Inclusion                                |
| AMI: volume of hospitalizations                                                   | Number of hospitalizations of patients diagnosed with AMI                                                                                                                                                 | HDR          | 410.9X                                                                                                                                          |                          |                                          |
| STEMI: volume of hospitalizations                                                 | Number of hospitalizations of patients diagnosed with STEMI                                                                                                                                               | HDR          | 410.XX                                                                                                                                          | 410.7X, 410.9.X          |                                          |
| STEMI: volume of hospitalizations with at least one PTCA                          | Number of hospitalizations of patients diagnosed with STEMI who received at least one PTCA                                                                                                                | HDR          | 410.XX                                                                                                                                          | 410.7X, 410.9.X          | 00.66, 36.01, 36.02, 36.05, 36.06, 36.07 |
| STEMI: proportion treated with PTCA within 90 minutes                             | Number of hospitalized patients diagnosed with STEMI who received PTCA within 90 minutes from access to ER / Number of hospitalization of patients diagnosed with STEMI                                   | HDR, HEIS    | 410.XX<br>411, 413, 414, 423.0, 426, 427, 428, 429.5, 429.6, 429.71, 429.79, 429.81, 518.4, 518.81, 780.01, 780.2, 785.51, 799.1, 997.02, 998.2 | 410.7X, 410.9.X<br>427.5 | 00.66, 36.01, 36.02, 36.05, 36.06 36.07  |
| STEMI: proportion of PTCA within 90 minutes of those treated with PTCA within 12h | Number of hospitalized patients diagnosed with STEMI who received PTCA within 90 minutes from access to ER / Number of hospitalization of patients diagnosed with STEMI who received PTCA within 12 hours | HDR, HEIS    | 410.XX<br>411, 413, 414, 423.0, 426, 427, 428, 429.5, 429.6, 429.71, 429.79, 429.81, 518.4, 518.81, 780.01, 780.2, 785.51, 799.1, 997.02, 998.2 | 410.7X, 410.9.X<br>427.5 | 00.66, 36.01, 36.02, 36.05, 36.06 36.07  |

|                              |                                                                                                                                                               |                         |                                                                                                                                                 |                          |                                         |
|------------------------------|---------------------------------------------------------------------------------------------------------------------------------------------------------------|-------------------------|-------------------------------------------------------------------------------------------------------------------------------------------------|--------------------------|-----------------------------------------|
| AMI: in-hospital mortality   | Number of hospitalized patients diagnosed with AMI who died during the hospital stay / Number of hospitalized patients diagnosed with AMI                     | HDR, HEIS, Tax Registry | 410.9X                                                                                                                                          |                          |                                         |
| STEMI: in-hospital mortality | Number of hospitalized patients diagnosed with STEMI who died during the hospital stay / Number of hospitalized patients diagnosed with STEMI                 | HDR, HEIS, Tax Registry | 410.XX<br>411, 413, 414, 423.0, 426, 427, 428, 429.5, 429.6, 429.71, 429.79, 429.81, 518.4, 518.81, 780.01, 780.2, 785.51, 799.1, 997.02, 998.2 | 410.7X, 410.9.X<br>427.5 | 00.66, 36.01, 36.02, 36.05, 36.06 36.07 |
| AMI: 30-day mortality        | Number of hospitalized patients diagnosed with STEMI who died during the 30 days after hospital discharge/ Number of hospitalized patients diagnosed with AMI | HDR, HEIS, Tax Registry |                                                                                                                                                 |                          |                                         |
| STEMI: 30-day mortality      | Number hospitalized patients diagnosed with STEMI who died during the 30 days after hospital discharge / Number of hospitalized patients diagnosed with STEMI | HDR, HEIS, Tax Registry | 410.XX<br>411, 413, 414, 423.0, 426, 427, 428, 429.5, 429.6, 429.71, 429.79, 429.81, 518.4, 518.81, 780.01, 780.2, 785.51, 799.1, 997.02, 998.2 | 410.7X, 410.9.X<br>427.5 | 00.66, 36.01, 36.02, 36.05, 36.06 36.07 |

STEMI: ST Elevation Myocardial Infarction

PTCA: Percutaneous Transluminal Coronary Angioplasty

ER: Emergency Room

HEIS: Healthcare Emergency Information System

HDR: Italian Hospital Discharge Registry

**Table S3.** Link to indicators protocols for AMI pathways.

| N | Indicators                                                                 | Link to indicator protocol                                                                                                                                |
|---|----------------------------------------------------------------------------|-----------------------------------------------------------------------------------------------------------------------------------------------------------|
| 1 | AMI: VOLUME OF HOSPITALIZATIONS                                            | <a href="https://www.dep.lazio.it/prevale2021/documenti/protocolli/pro_122.pdf">https://www.dep.lazio.it/prevale2021/documenti/protocolli/pro_122.pdf</a> |
| 2 | STEMI: VOLUME OF HOSPITALIZATIONS                                          | <a href="https://www.dep.lazio.it/prevale2021/documenti/protocolli/pro_98.pdf">https://www.dep.lazio.it/prevale2021/documenti/protocolli/pro_98.pdf</a>   |
| 3 | STEMI: VOLUME OF HOSPITALIZATIONS WITH AT LEAST ONE PTCA                   | <a href="https://www.dep.lazio.it/prevale2021/documenti/protocolli/pro_206.pdf">https://www.dep.lazio.it/prevale2021/documenti/protocolli/pro_206.pdf</a> |
| 4 | STEMI: PROPORTION TREATED WITH PTCA WITHIN 90 MINUTES (INPATIENT FACILITY) | <a href="https://www.dep.lazio.it/prevale2021/documenti/protocolli/pro_610.pdf">https://www.dep.lazio.it/prevale2021/documenti/protocolli/pro_610.pdf</a> |
| 5 | STEMI: PROPORTION OF PTCA WITHIN 90' OF TOTAL TREATED WITH PTCA WITHIN 12H | <a href="https://www.dep.lazio.it/prevale2021/documenti/protocolli/pro_33.pdf">https://www.dep.lazio.it/prevale2021/documenti/protocolli/pro_33.pdf</a>   |
| 6 | AMI: 30-DAY MORTALITY (INPATIENT FACILITY)                                 | <i>Available upon request</i>                                                                                                                             |
| 7 | STEMI: 30-DAY MORTALITY (INPATIENT FACILITY)                               | <i>Available upon request</i>                                                                                                                             |
| 8 | AMI: 30-DAY MORTALITY                                                      | <a href="https://www.dep.lazio.it/prevale2021/documenti/protocolli/pro_1.pdf">https://www.dep.lazio.it/prevale2021/documenti/protocolli/pro_1.pdf</a>     |
| 9 | STEMI: 30-DAY MORTALITY                                                    | <a href="https://www.dep.lazio.it/prevale2021/documenti/protocolli/pro_7.pdf">https://www.dep.lazio.it/prevale2021/documenti/protocolli/pro_7.pdf</a>     |

**Table S4.** Link to indicators protocols for ischemic stroke pathways.

| N | Indicators                                                         | Link to indicator protocol                                                                                                                                |
|---|--------------------------------------------------------------------|-----------------------------------------------------------------------------------------------------------------------------------------------------------|
| 1 | ISCHEMIC STROKE: VOLUME OF HOSPITALIZATIONS                        | <a href="https://www.dep.lazio.it/prevale2021/documenti/protocolli/pro_125.pdf">https://www.dep.lazio.it/prevale2021/documenti/protocolli/pro_125.pdf</a> |
| 2 | ISCHEMIC STROKE: NUMBER OF THROMBOLYSIS TREATMENTS AT THE FACILITY | <i>Available upon request</i>                                                                                                                             |
| 3 | ISCHEMIC STROKE: 30-DAY HOSPITAL READMISSIONS                      | <a href="https://www.dep.lazio.it/prevale2021/documenti/protocolli/pro_19.pdf">https://www.dep.lazio.it/prevale2021/documenti/protocolli/pro_19.pdf</a>   |
| 4 | ISCHEMIC STROKE: IN-HOSPITAL MORTALITY                             | <i>Available upon request</i>                                                                                                                             |
| 5 | ISCHEMIC STROKE: 30-DAY MORTALITY AFTER FIRST ACCESS               | <a href="https://www.dep.lazio.it/prevale2021/documenti/protocolli/pro_18.pdf">https://www.dep.lazio.it/prevale2021/documenti/protocolli/pro_18.pdf</a>   |

**Figure S1: Number of hospitalizations of patients with STEMI by facility (2021).**

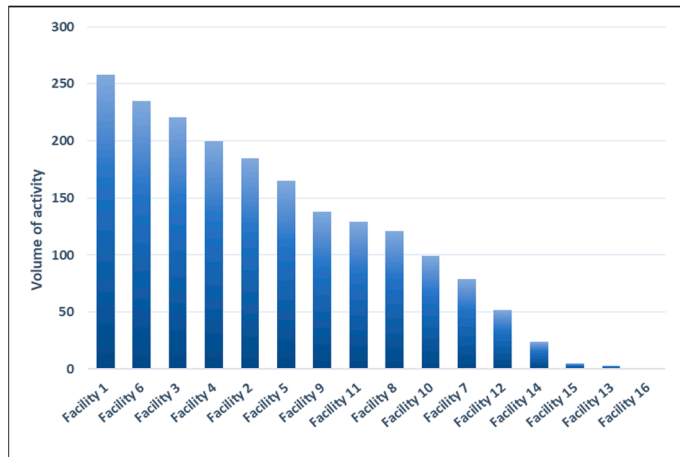

**Table S5: Number of hospitalizations of patients with STEMI by facility (2021, 2020, 2019).**

| Facility     | Volume of Activity |             |             |
|--------------|--------------------|-------------|-------------|
|              | 2021               | 2020        | 2019        |
| <b>Lazio</b> | <b>3249</b>        | <b>3219</b> | <b>3658</b> |
| Facility 1   | 258                | 299         | 410         |
| Facility 6   | 235                | 210         | 241         |
| Facility 3   | 221                | 204         | 270         |
| Facility 4   | 200                | 177         | 186         |
| Facility 2   | 185                | 150         | 193         |
| Facility 5   | 165                | 186         | 197         |
| Facility 9   | 138                | 132         | 182         |
| Facility 11  | 129                | 133         | 132         |
| Facility 8   | 121                | 126         | 126         |
| Facility 10  | 99                 | 116         | 127         |
| Facility 7   | 79                 | 83          | 101         |
| Facility 12  | 52                 | 84          | 119         |
| Facility 14  | 24                 | 9           | 19          |
| Facility 15  | 5                  | 3           | 3           |
| Facility 13  | 3                  | 11          | 8           |
| Facility 16  | 1                  | 4           | 1           |

**Figure S2: Proportion of patients with STEMI treated with PTCA within 90 min from access to ER of total treated with PTCA within 12h, by facility (2021).**

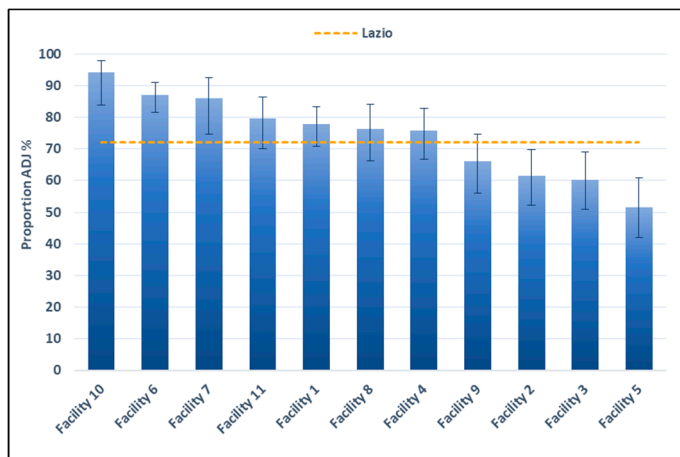

**Table S6: Proportion of patients with STEMI treated with PTCA within 90 min from access to ER of total treated with PTCA within 12h, by facility (2021).**

| Facility     | N           | Crude %      | 95%CI        |              | Adj % | 95%CI |       |
|--------------|-------------|--------------|--------------|--------------|-------|-------|-------|
| <b>Lazio</b> | <b>1997</b> | <b>72.26</b> | <b>70.25</b> | <b>74.18</b> | —     | —     | —     |
| Facility 10  | 52          | 94.23        | 84.36        | 98.02        | 94.25 | 83.85 | 98.03 |
| Facility 6   | 195         | 86.67        | 81.18        | 90.74        | 86.97 | 81.53 | 90.96 |
| Facility 7   | 57          | 84.21        | 72.64        | 91.46        | 85.96 | 74.79 | 92.62 |
| Facility 11  | 93          | 79.57        | 70.28        | 86.51        | 79.58 | 70.17 | 86.57 |
| Facility 1   | 171         | 78.36        | 71.6         | 83.87        | 77.86 | 70.94 | 83.51 |
| Facility 8   | 88          | 77.27        | 67.49        | 84.78        | 76.45 | 66.35 | 84.23 |
| Facility 4   | 111         | 76.58        | 67.89        | 83.48        | 75.76 | 66.81 | 82.9  |
| Facility 9   | 99          | 66.67        | 56.91        | 75.18        | 66.05 | 56.12 | 74.74 |
| Facility 2   | 118         | 62.71        | 53.72        | 70.91        | 61.45 | 52.3  | 69.85 |
| Facility 3   | 113         | 60.18        | 50.96        | 68.73        | 60.32 | 50.95 | 68.98 |
| Facility 5   | 106         | 51.89        | 42.48        | 61.17        | 51.46 | 41.95 | 60.86 |
| Facility 12  | 27          | 55.56        | 37.31        | 72.41        | —     | —     | —     |
| Facility 14  | 1           | 0.00         | —            | —            | —     | —     | —     |
| Facility 15  | 1           | 0.00         | —            | —            | —     | —     | —     |
| Facility 13  | —           | —            | —            | —            | —     | —     | —     |
| Facility 16  | —           | —            | —            | —            | —     | —     | —     |

**Figure S3: Mortality within 30 days after first admission to hospital for AMI, by facility (2021).**

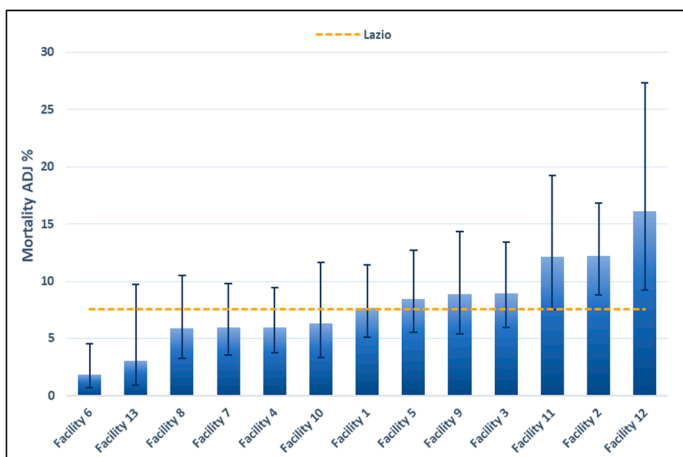

**Table S7: Mortality within 30 days after first admission to hospital for AMI, by facility (2021).**

| Facility     | N           | Crude %     | 95%CI       |             | Adj % | 95%CI |       |
|--------------|-------------|-------------|-------------|-------------|-------|-------|-------|
| <b>Lazio</b> | <b>6302</b> | <b>7.55</b> | <b>6.93</b> | <b>8.23</b> | —     | —     | —     |
| Facility 6   | 303         | 1.65        | 0.71        | 3.80        | 1.84  | 0.74  | 4.52  |
| Facility 13  | 71          | 4.23        | 1.45        | 11.70       | 3.02  | 0.91  | 9.72  |
| Facility 8   | 262         | 4.58        | 2.64        | 7.83        | 5.92  | 3.29  | 10.52 |
| Facility 7   | 262         | 6.87        | 4.39        | 10.60       | 5.94  | 3.58  | 9.76  |
| Facility 4   | 358         | 5.87        | 3.87        | 8.80        | 5.96  | 3.74  | 9.43  |
| Facility 10  | 179         | 6.15        | 3.47        | 10.67       | 6.30  | 3.35  | 11.65 |
| Facility 1   | 421         | 6.41        | 4.44        | 9.17        | 7.68  | 5.12  | 11.44 |
| Facility 5   | 292         | 9.25        | 6.43        | 13.12       | 8.43  | 5.55  | 12.70 |
| Facility 9   | 232         | 7.76        | 4.96        | 11.93       | 8.86  | 5.41  | 14.31 |
| Facility 3   | 325         | 8.31        | 5.77        | 11.82       | 8.97  | 5.95  | 13.39 |
| Facility 11  | 183         | 10.93       | 7.19        | 16.28       | 12.12 | 7.50  | 19.24 |
| Facility 2   | 389         | 10.80       | 8.09        | 14.27       | 12.24 | 8.83  | 16.84 |
| Facility 12  | 102         | 14.71       | 9.12        | 22.85       | 16.12 | 9.21  | 27.32 |
| Facility 15  | 12          | 25.00       | 8.89        | 53.23       | —     | —     | —     |
| Facility 14  | 42          | 14.29       | 6.72        | 27.84       | —     | —     | —     |
| Facility 16  | 7           | 42.86       | 15.82       | 74.95       | —     | —     | —     |

**Figure S4:** In-hospital mortality within 30 days after first admission to hospital for STEMI, by facility (2021).

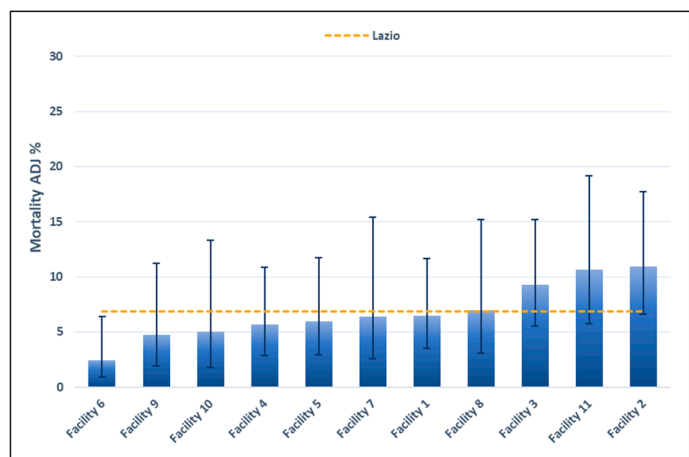

**Table S8:** In-hospital mortality within 30 days after first admission to hospital for STEMI, by facility (2021).

| Facility    | N    | Crude % | 95%CI |       | Adj % | 95%CI |       |
|-------------|------|---------|-------|-------|-------|-------|-------|
| Lazio       | 2623 | 6.86    | 5.96  | 7.89  | -     | -     | -     |
| Facility 6  | 206  | 1.94    | 0.76  | 4.89  | 2.42  | 0.90  | 6.41  |
| Facility 9  | 122  | 4.10    | 1.76  | 9.24  | 4.73  | 1.94  | 11.22 |
| Facility 10 | 77   | 5.19    | 2.04  | 12.61 | 5.02  | 1.81  | 13.32 |
| Facility 4  | 164  | 6.10    | 3.35  | 10.86 | 5.68  | 2.90  | 10.90 |
| Facility 5  | 136  | 6.62    | 3.52  | 12.10 | 5.96  | 2.97  | 11.71 |
| Facility 7  | 71   | 7.04    | 3.05  | 15.45 | 6.41  | 2.56  | 15.42 |
| Facility 1  | 201  | 5.47    | 3.08  | 9.53  | 6.47  | 3.53  | 11.65 |
| Facility 8  | 110  | 5.45    | 2.52  | 11.39 | 6.94  | 3.06  | 15.17 |
| Facility 3  | 168  | 9.52    | 5.95  | 14.91 | 9.25  | 5.53  | 15.18 |
| Facility 11 | 109  | 11.01   | 6.41  | 18.26 | 10.69 | 5.78  | 19.16 |
| Facility 2  | 161  | 10.56   | 6.70  | 16.26 | 10.94 | 6.61  | 17.73 |
| Facility 12 | 39   | 23.08   | 12.65 | 38.34 | -     | -     | -     |
| Facility 15 | 3    | 33.33   | 6.15  | 79.23 | -     | -     | -     |
| Facility 14 | 6    | 0.00    | -     | -     | -     | -     | -     |
| Facility 13 | 2    | 0.00    | -     | -     | -     | -     | -     |
| Facility 16 | 1    | 0.00    | -     | -     | -     | -     | -     |

**Figure S5:** In-hospital mortality within 30 days after first admission to hospital for AMI, by facility (2021).

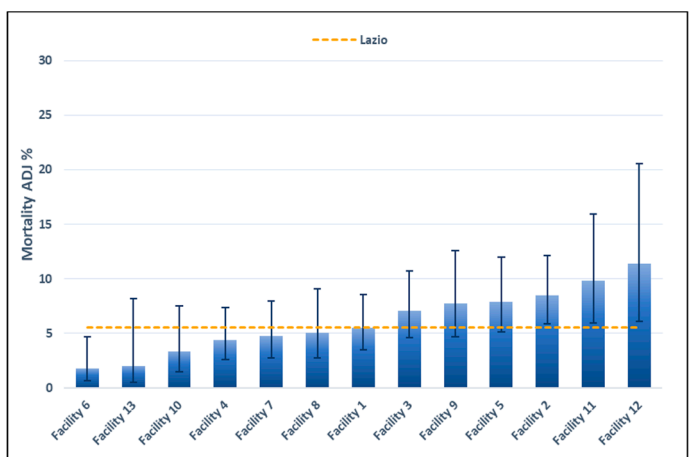

**Table S9:** In-hospital mortality within 30 days after first admission to hospital for AMI, by facility (2021).

| Facility    | N    | Crude % | 95%CI |       | Adj % | 95%CI |       |
|-------------|------|---------|-------|-------|-------|-------|-------|
| Lazio       | 6302 | 5.52    | 4.98  | 6.11  | -     | -     | -     |
| Facility 6  | 303  | 1.32    | 0.51  | 3.34  | 1.77  | 0.66  | 4.70  |
| Facility 13 | 71   | 2.82    | 0.78  | 9.70  | 2.05  | 0.50  | 8.18  |
| Facility 10 | 179  | 3.35    | 1.55  | 7.12  | 3.36  | 1.48  | 7.49  |
| Facility 4  | 358  | 4.47    | 2.77  | 7.14  | 4.42  | 2.64  | 7.34  |
| Facility 7  | 262  | 5.73    | 3.50  | 9.23  | 4.74  | 2.78  | 7.99  |
| Facility 8  | 262  | 4.20    | 2.36  | 7.36  | 5.04  | 2.76  | 9.08  |
| Facility 1  | 421  | 4.75    | 3.10  | 7.22  | 5.48  | 3.49  | 8.55  |
| Facility 3  | 325  | 7.08    | 4.76  | 10.40 | 7.07  | 4.60  | 10.74 |
| Facility 9  | 232  | 7.33    | 4.62  | 11.42 | 7.74  | 4.70  | 12.58 |
| Facility 5  | 292  | 7.88    | 5.31  | 11.54 | 7.88  | 5.13  | 11.99 |
| Facility 2  | 389  | 8.23    | 5.89  | 11.38 | 8.48  | 5.88  | 12.12 |
| Facility 11 | 183  | 9.29    | 5.88  | 14.37 | 9.84  | 5.96  | 15.94 |
| Facility 12 | 102  | 10.78   | 6.13  | 18.29 | 11.36 | 6.08  | 20.53 |
| Facility 15 | 12   | 16.67   | 4.70  | 44.80 | -     | -     | -     |
| Facility 14 | 42   | 4.76    | 1.32  | 15.79 | -     | -     | -     |
| Facility 16 | 7    | 14.29   | 2.57  | 51.31 | -     | -     | -     |



**Figure S6:** Proportion of patients with STEMI treated with PTCA within 90 min from access to ER, by facility (2021). A: facility in volume class 0-10, B: facility in volume class 11-50, C: facility in volume class 51-100, D: facility in volume class 101-150, E: facility in volume class  $\geq 150$ .

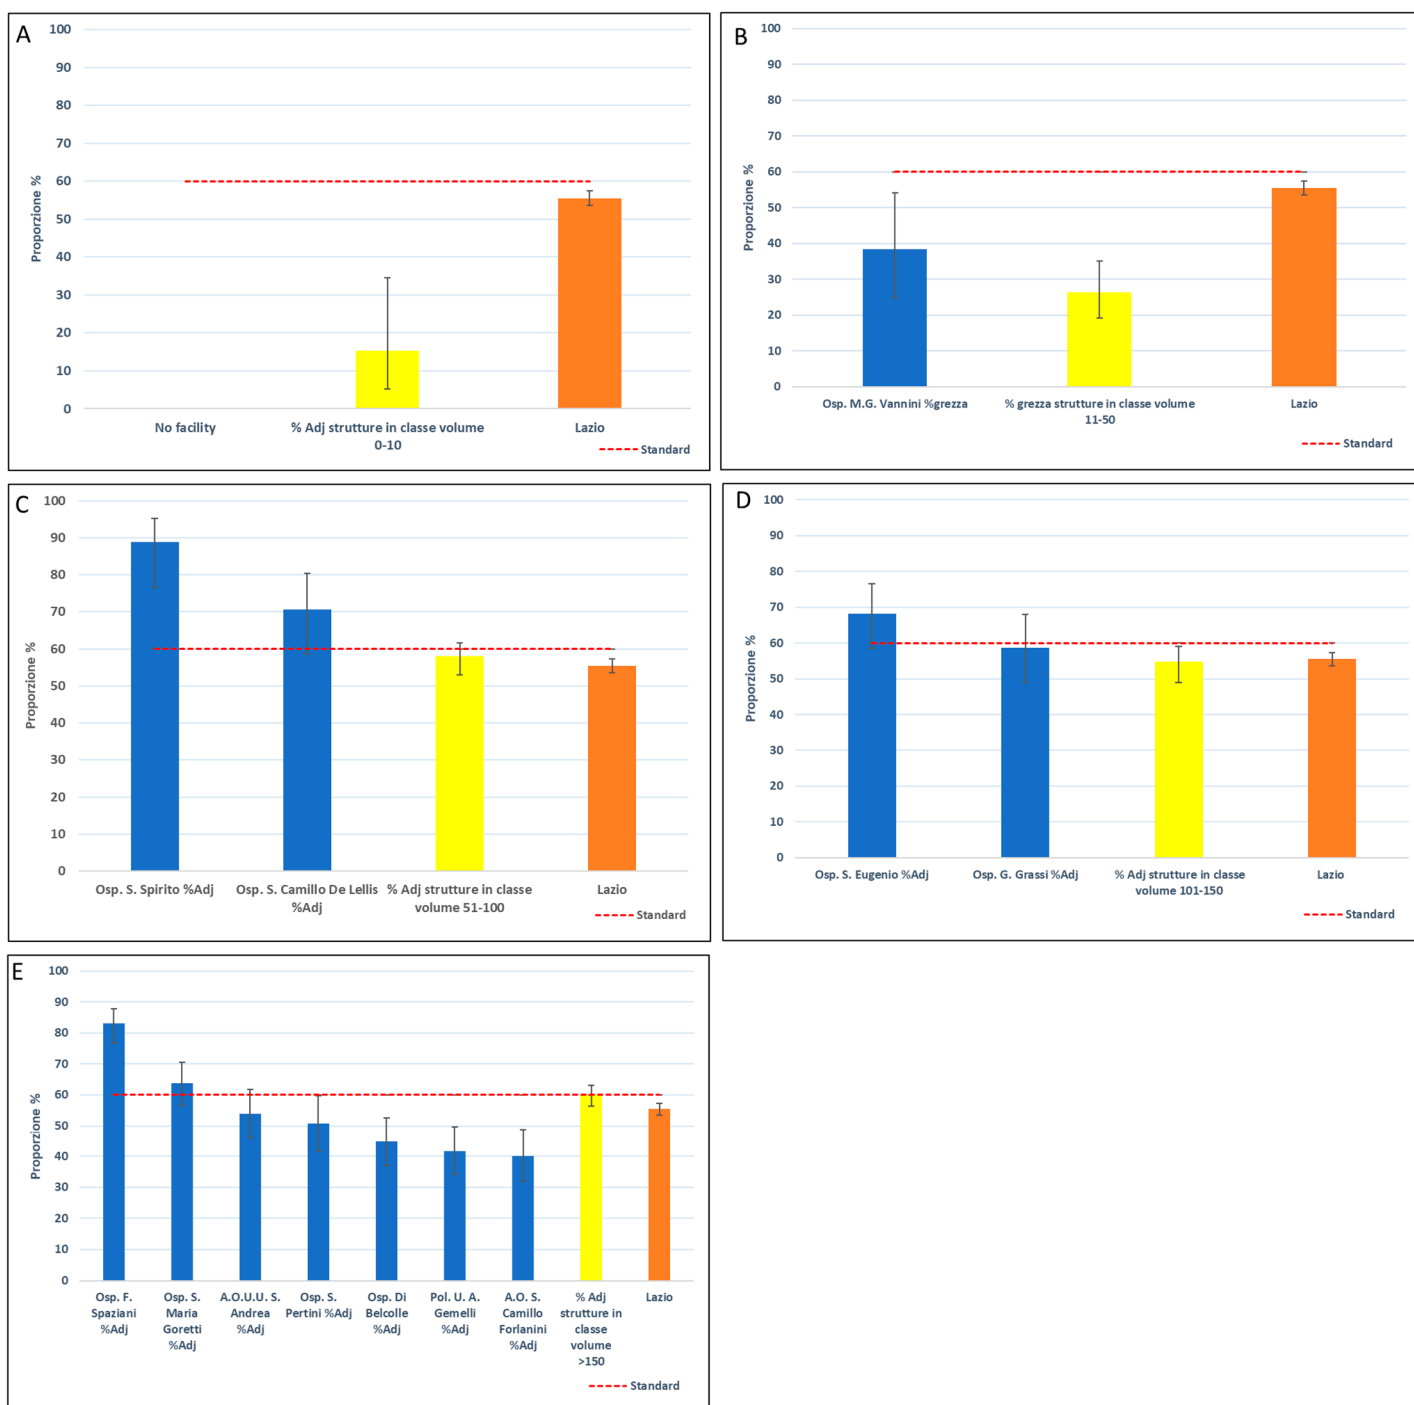

**Figure S7:** Mortality within 30 days after first admission to hospital for STEMI, by facility (2021). A: facility in volume class 0-10, B: facility in volume class 11-50, C: facility in volume class 51-100, D: facility in volume class 101-150, E: facility in volume class  $\geq 150$ .

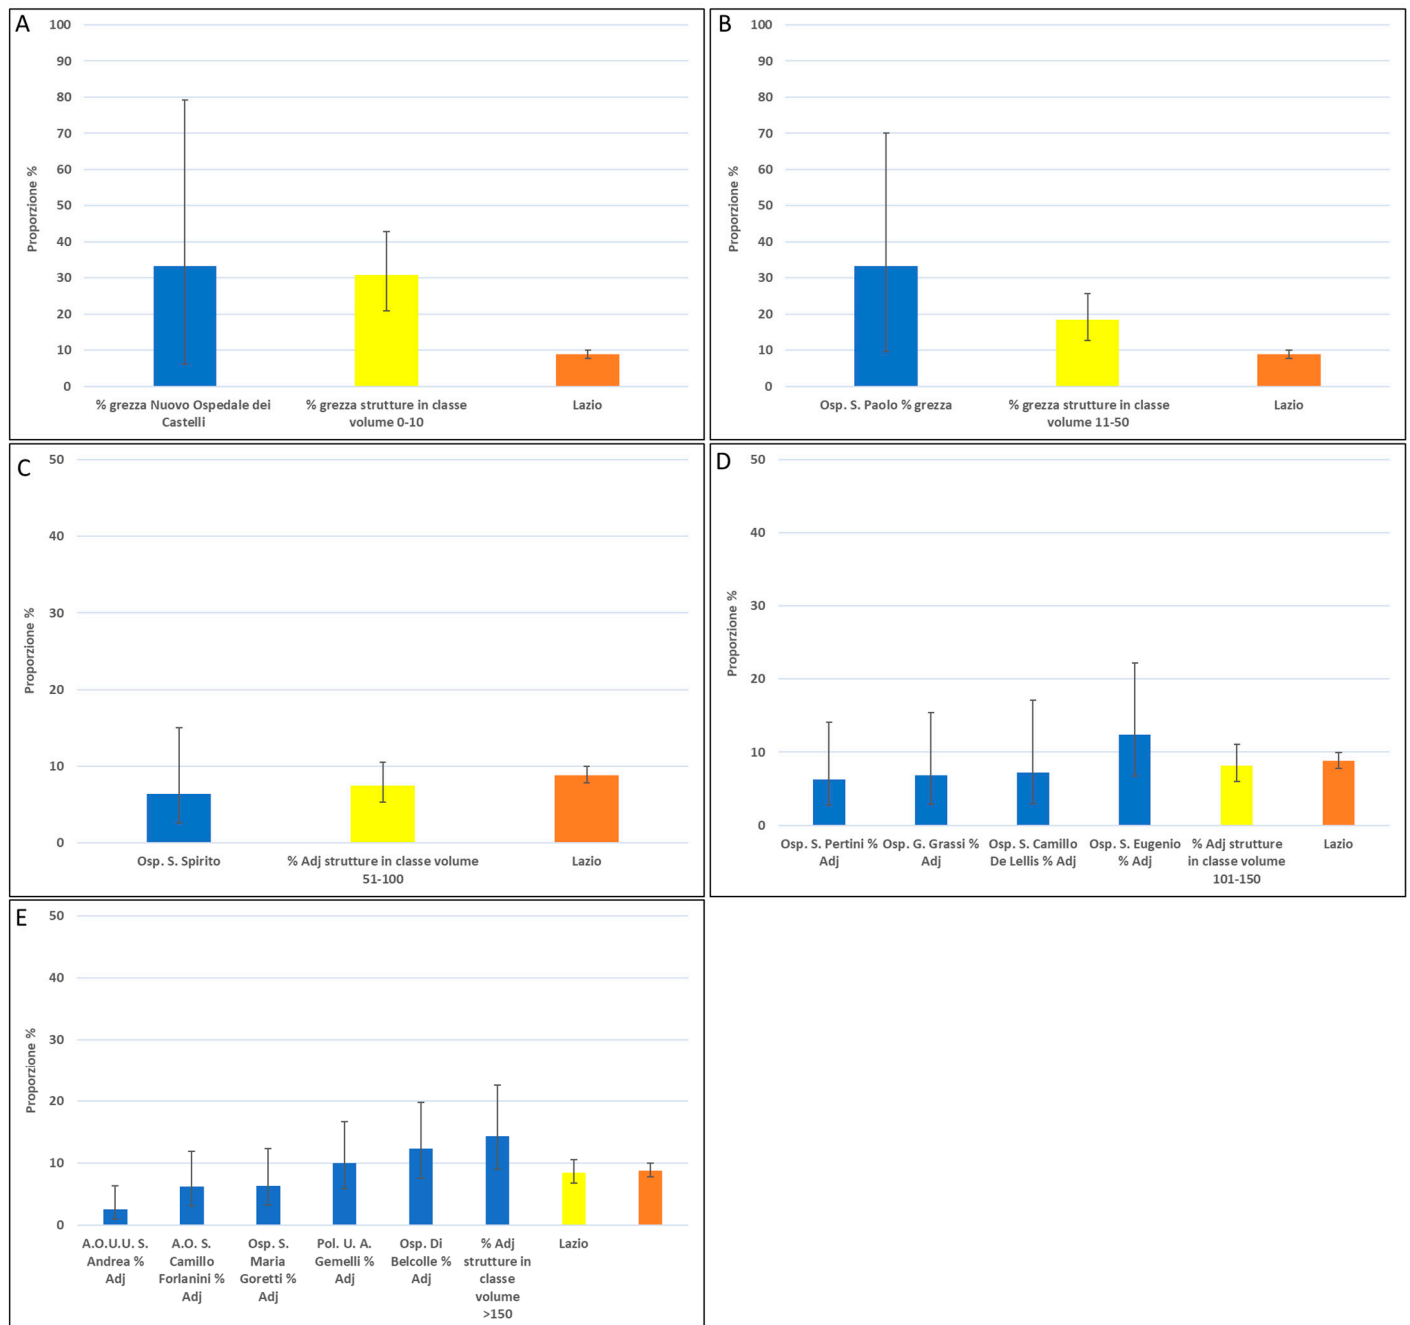

Supplement: s1 [file s1]
